# Supplementary material
Source: MDPI journal article supplement (https://www.mdpi.com/2624-5647/3/3/11)
Supplement: s1 [file s1]

Archive with 1 entries (1 files):
- gastrointestdisord-1031134-SI.pdf
